# The Association between Self-Reported Sleep Quality and Metabolic Syndrome

Hao-Chang Hung<sup>1</sup>, Yi-Ching Yang<sup>2,3</sup>, Horng-Yih Ou<sup>1,4</sup>, Jin-Shang Wu<sup>2,3</sup>, Feng-Hwa Lu<sup>2,3</sup>, Chih-Jen Chang<sup>2,3\*</sup>

**1** Division of Endocrinology and Metabolism, Department of Internal Medicine, National Cheng Kung University Hospital, Tainan, Taiwan, **2** Department of Family Medicine, National Cheng Kung University Hospital, Tainan, Taiwan, **3** Department of Family Medicine, College of Medicine, National Cheng Kung University, Tainan, Taiwan, **4** Department of Internal Medicine, College of Medicine, National Cheng Kung University, Tainan, Taiwan

## Abstract

**Objectives:** Short and long sleep duration are associated with metabolic syndrome. However, there is limited research on the association between sleep quality and metabolic syndrome, and thus the aim of this study is to investigate this relationship.

**Materials and Methods:** The cross-sectional baseline data were collected from the decoded database of the Prevention Health Center of National Cheng Kung University Hospital from 2002 to 2006. The diagnosis of metabolic syndrome was according to the statement of the American Heart Association/National Heart, Lung, and Blood Institute. Sleep quality was assessed using the Pittsburgh Sleep Quality Index (PSQI). A higher global PSQI score indicates poorer sleep quality, and a global PSQI score greater than five differentiates poor from good sleepers.

**Results:** Of the 3,435 subjects recruited, 899 (26.2%) had metabolic syndrome. Subjects with metabolic syndrome had higher PSQI and prevalence of poor sleepers than those without metabolic syndrome. The multivariate lineal regression analysis showed that female gender, metabolic syndrome, sleep duration, snoring, alcohol drinking, and habitual exercise were independent predictors of PSQI. When substituting metabolic syndrome with the five components, hyperglycemia and low high-density lipoprotein cholesterol (HDL-C) were positively associated with PSQI. The multivariate logistic regression analyses showed that female gender, metabolic syndrome, sleep duration, and snoring were independently associated with being poor sleepers. Of the five components, only low HDL-C was an independent predictor of being poor sleepers.

**Conclusions:** Subjects with metabolic syndrome have higher global PSQI scores and a higher risk of being poor sleepers. Of the five components of metabolic syndrome, hyperglycemia and low HDL-C are independently associated with the global PSQI scores, while low HDL-C is an independent predictor of being poor sleepers.

**Citation:** Hung H-C, Yang Y-C, Ou H-Y, Wu J-S, Lu F-H, et al. (2013) The Association between Self-Reported Sleep Quality and Metabolic Syndrome. PLoS ONE 8(1): e54304. doi:10.1371/journal.pone.0054304

**Editor:** Renato Pasquali, Azienda Policlinico S. Orsola-Malpighi, Italy

**Received:** September 27, 2012; **Accepted:** December 10, 2012; **Published:** January 14, 2013

**Copyright:** © 2013 Hung et al. This is an open-access article distributed under the terms of the Creative Commons Attribution License, which permits unrestricted use, distribution, and reproduction in any medium, provided the original author and source are credited.

**Funding:** This study was supported by grants from National Cheng Kung University Hospital (NCKUH-10002031, NCKUH-10102036). The funder had no role in study design, data collection and analysis, decision to publish, or preparation of the manuscript.

**Competing Interests:** The authors have declared that no competing interests exist.

\* E-mail: changcj.ncku@gmail.com

## Introduction

Adequate sleep quality and quantity are important for the normal functioning of daily metabolic and hormonal processes and appetite regulation [1]. Chronic sleep debt, which is increasingly common in developed countries, is associated with metabolic and endocrine alterations that may have pathological consequences in the long term [2]. Furthermore, many studies have shown that sleep duration is associated with diabetes [3,4], obesity [5,6], cardiovascular disease [7,8], and all-cause mortality [9]. In addition to sleep duration, reduced sleep quality without changes in duration is associated with insulin resistance [10,11], and sleep disturbances are also related to diabetes [4] and all-cause mortality [12].

Metabolic syndrome represents a cluster of coronary heart disease risk factors, including obesity, elevated blood pressure, high

fasting plasma glucose and triglyceride concentrations, and low serum high-density lipoprotein cholesterol levels [13]. It is associated with several potentially modifiable lifestyle factors, such as smoking, alcohol consumption, and physical inactivity [14]. Furthermore, both short and long sleep duration are associated with metabolic syndrome [15–17]. However, there is limited research on the association between sleep quality and metabolic syndrome and its components. Recently, in the Coronary Artery Risk Development in Young Adults Sleep Study, where actigraphy was used to assess sleep, both shorter sleep duration and greater sleep fragmentation were associated with higher body mass index [18], but not with markers of glucose metabolism in non-diabetic middle-aged adults [19].

The Pittsburgh Sleep Quality Index (PSQI) is a widely used and well-validated measure of sleep quality, and is suitable for

epidemiologic investigations [20]. Jennings et al. showed that the PSQI is associated with metabolic syndrome in a sample of two hundred and ten Caucasian adults [21]. However, their sample size was relatively small, and they did not exclude conditions that might affect sleep quality, such as depression, thyroid disease and chronic pain. Therefore, the aim of this study is to investigate the association between the components of metabolic syndrome and sleep quality, using the PSQI.

## Materials and Methods

The cross-sectional baseline data were collected from the decoded database of the Prevention Health Center of National Cheng Kung University Hospital from 2002 to 2006. The study protocol was approved by the Institutional Review Board of the National Cheng Kung University Hospital. Subjects who received a health examination were included. All the subjects completed a structured questionnaire, which included demographic information, medical history, medication history, sleep assessment, smoking, alcohol drinking, and exercise habits. Informed consent was obtained from all of the participants. Because they only agreed to have their questionnaire data and related examination results analyzed anonymously, any identifying information was kept confidential. Those subjects who had the following conditions or diseases were excluded: 1) self-reported depression, anxiety, or other psychiatric disorders; 2) serum creatinine  $>132.6 \mu\text{mol/l}$ ; 3) serum aspartate aminotransferase (AST) or alanine aminotransferase (ALT) levels more than twice the normal upper limit; 4) cancers; 5) history of obstructive sleep apnea; 6) history of thyroid diseases; 7) history of cerebrovascular diseases; and 8) chronic pain.

Sleep quality was measured using the Pittsburgh Sleep Quality Index (PSQI), which is a validated self-rated questionnaire that assesses sleep quality and disturbances over a one-month time interval [20]. The 19 items in the index generate seven component scores that reflect sleep problems in the areas of subjective sleep quality, sleep latency, sleep duration, habitual sleep efficiency, sleep disturbances, use of sleep medications, and daytime dysfunction. The sum of the scores for these seven components produces a global sleep quality score with a range of 0–21 points. A higher global PSQI score indicates poorer sleep quality, and a global PSQI score greater than 5 has a diagnostic sensitivity of 89.6% and specificity of 86.5% in differentiating poor from good sleepers. Snoring is defined as coughing or snoring loudly three times or more a week during the past month. The Chinese version of the Pittsburgh Sleep Quality Index has an overall reliability coefficient of 0.82–0.83, and acceptable test-retest reliability with a coefficient of 0.77–0.85 [22].

Wearing light indoor clothes, each subject's body height (to the nearest 0.1 cm), weight (to the nearest 0.1 kg), and waist circumference (to the nearest 0.1 cm) was measured. Waist circumference measurement was performed at the end of normal expiration in duplicate on bare skin midway between the lower rib margin and the iliac crest. Body mass index (BMI) was calculated as weight (in kilograms) divided by height (in meters) squared. For blood pressure measurement, each subject rested 10 minutes in a supine position in a quiet ambience, and measurements were obtained in a fasting state between 08:00 and 10:00 AM. Two blood pressure readings, separated by intervals of at least 5 min, were taken with an appropriate-sized cuff wrapped around the right upper arm using a DINAMAP vital sign monitor (model 1846SX; Critikon Inc., Irvine, CA).

All subjects underwent 12-h overnight fasting and blood sampling for basic biochemical examinations, including for

creatinine, AST, ALT, total cholesterol, triglyceride, high-density lipoprotein cholesterol (HDL-C), and fasting plasma glucose (FPG). Blood glucose was measured by a hexokinase method (Roche Diagnostic GmbH, Mannheim, Germany) with an auto-analyzer Hitachi 747E. Serum total cholesterol, triglycerides, and HDL-C levels were determined in the central laboratory of National Cheng Kung University Hospital with the same autoanalyzer.

Metabolic syndrome was defined according to the statement of the American Heart Association/National Heart, Lung, and Blood Institute for Asian populations [13]. A subject was said to have metabolic syndrome when any three of the following five risk factors were present: 1) waist circumference (WC)  $\geq 90$  cm for men,  $\geq 80$  cm for women; 2) systolic blood pressure (SBP)  $\geq 130$  mmHg, or diastolic pressure (DBP)  $\geq 85$  mmHg, or current medication for hypertension; 3) HDL-C  $<1.03$  mmol/l in men,  $<1.3$  mmol/l in women; (4) fasting plasma glucose (FPG)  $\geq 5.6$  mmol/l or current use of antidiabetic therapy; and (5) triglyceride  $\geq 1.7$  mmol/l. Habitual exercise was defined as vigorous exercise three or more times per week when the subjects engaged in activities sufficient to work up a sweat [23]. Smoking habit was classified into smokers (defined as at least one pack/month for the previous six months) and non-smokers. Alcohol drinking habit was classified into drinkers (defined by at least one drink per week for the previous six months) and non-drinkers.

## Statistics

SPSS software (version 17.0; SPSS, Chicago, IL) was used for statistical analysis. All normally distributed continuous variables were expressed as means  $\pm$  SD. Study subjects were categorized into two groups: with and without metabolic syndrome. Chi-square tests were used to analyze the difference in variables between groups. Multivariate linear regression analysis was conducted to identify independent predictors of the global PSQI score. Initially, the independent variables included age, gender, the presence of metabolic syndrome, short ( $<6$  vs. 6–8 hours) and long ( $\geq 8$  vs. 6–8 hours) sleep duration. Further adjustments for snoring, alcohol drinking, smoking, habitual exercise, and creatinine were made. The same independent variables, except for the presence of metabolic syndrome, were then used in a multivariate linear regression analysis relating each component of the metabolic syndrome to the global PSQI score. Multivariate logistic regression analysis was conducted to identify independent determinants of poor sleepers (global PSQI score  $>5$ ) by using the same variables stepwise in the multivariate linear regression analyses. A  $p$  value of less than 0.05 was considered statistically significant.

## Results

Of the total 3,435 subjects recruited, 899 (26.2%) had metabolic syndrome. Subjects with metabolic syndrome were older, and had higher BMI, WC, SBP, DBP, total cholesterol, triglyceride, and creatinine levels, and a higher prevalence of being elderly (aged  $\geq 60$  years), snoring, smoking habit, and alcohol drinking, but had lower HDL-C concentrations and less prevalence of being female or doing habitual exercise, than those without metabolic syndrome. In addition, the prevalence of central obesity, elevated blood pressure, hyperglycemia, hypertriglyceridemia, and low HDL-C was also significantly higher in subjects with metabolic syndrome (Table 1). Subjects with metabolic syndrome had higher global PSQI scores ( $6.7 \pm 3.2$  vs.  $6.1 \pm 2.4$ ,  $p < 0.001$ ) and a greater prevalence of poor sleepers (63.4% vs. 53.5%,  $p < 0.001$ ) than those without metabolic syndrome.

**Table 1.** Comparisons of clinical characteristics between subjects with and without metabolic syndrome.

|                             | Metabolic syndrome |             | P value |
|-----------------------------|--------------------|-------------|---------|
|                             | Yes                | No          |         |
| N                           | 899 (26.2)         | 2536 (73.8) | –       |
| Age (years)                 | 50.8±11.8          | 43.5±11.8   | <0.001  |
| Age ≥60 years (%)           | 22.8               | 9.1         | <0.001  |
| Female gender (%)           | 26.8               | 38.9        | <0.001  |
| Global PSQI score           | 6.7±3.2            | 6.1±2.4     | <0.001  |
| Poor sleepers (%)           | 63.4               | 53.5        | <0.001  |
| BMI (kg/m <sup>2</sup> )    | 27.1±3.3           | 23.4±3.0    | <0.001  |
| Waist circumference (cm)    | 92.0±8.3           | 80.4±8.9    | <0.001  |
| SBP (mmHg)                  | 139.5±16.9         | 120.5±16.0  | <0.001  |
| DBP (mmHg)                  | 75.2±9.1           | 66.6±8.9    | <0.001  |
| FPG (mmol/l)                | 5.9±2.0            | 4.9±0.8     | <0.001  |
| Total cholesterol (mmol/l)  | 5.2±1.0            | 5.0±0.9     | <0.001  |
| Triglyceride (mmol/l)       | 2.3±1.4            | 1.2±0.6     | <0.001  |
| HDL-C (mmol/l)              | 1.0±0.2            | 1.3±0.3     | <0.001  |
| Creatinine (μmol/l)         | 81.4±15.9          | 77.5±15.6   | <0.001  |
| Smoking habit (%)           | 22.7               | 16.4        | <0.001  |
| Alcohol drinking (%)        | 21.1               | 16.9        | <0.01   |
| Habitual exercise (%)       | 36.0               | 40.0        | <0.05   |
| Central obesity (%)         | 79.3               | 19.2        | <0.001  |
| Elevated blood pressure (%) | 73.6               | 23.0        | <0.001  |
| Hyperglycemia (%)           | 47.9               | 6.6         | <0.001  |
| Hypertriglyceridemia (%)    | 71.6               | 13.7        | <0.001  |
| Low HDL (%)                 | 78.0               | 24.4        | <0.001  |
| Snoring ≥3 times/week (%)   | 33.9               | 17.6        | <0.001  |

Data are expressed as means ± SD or %.

Abbreviations: SBP, systolic blood pressure; DBP, diastolic blood pressure; FPG, fasting plasma glucose. HDL cholesterol, high-density lipoprotein cholesterol. doi:10.1371/journal.pone.0054304.t001

The results of multivariate linear regression analysis of clinical variables and the global PSQI score in Table 2 show that female gender ( $p<0.001$ ), metabolic syndrome ( $p<0.001$ ), and short sleep duration ( $p<0.001$ ) were positively associated with the global PSQI score after adjusting for age and gender (Model 1), whereas long sleep duration ( $p<0.001$ ) was negatively associated with it. Further adjusting for snoring, habitual exercise, alcohol drinking, smoking habit, and creatinine (Model 2) showed that female gender ( $p<0.001$ ), metabolic syndrome ( $p<0.001$ ), short sleep duration ( $p<0.001$ ), snoring ( $p<0.001$ ), and alcohol drinking ( $p<0.05$ ) were positively associated with the global PSQI score, whereas long sleep duration ( $p<0.001$ ) and habitual exercise ( $p<0.05$ ) were negatively associated with it. When substituting metabolic syndrome in Model 2 with the five components of metabolic syndrome (Model 3), hyperglycemia ( $p<0.05$ ) and low HDL-C ( $p<0.005$ ) were positively associated with the global PSQI scores.

The relationship between poor sleepers (global PSQI >5) and metabolic syndrome was examined with multivariate logistic regression analyses (Table 3). The results showed that female gender ( $p<0.001$ ), metabolic syndrome ( $p<0.001$ ), short sleep duration ( $p<0.005$ ), long sleep duration ( $p<0.001$ ), and snoring ( $p<0.005$ ) were independently associated with being poor sleepers

after adjusting for being elderly, alcohol drinking, smoking, habitual exercise, and creatinine (Model 1). Of the five components of metabolic syndrome (Model 2), only low HDL-C ( $p<0.05$ ) was an independent predictor of being a poor sleeper.

## Discussion

Our results show that subjects with metabolic syndrome have a significantly higher global PSQI score, and that the presence of metabolic syndrome is associated with a 0.9 increase in this. Jennings et al. showed that an increase in the global PSQI score of 2.6 points is associated with a 44% risk of having metabolic syndrome after adjusting for age and gender in Caucasian adults [21]. Although Jennings et al. found positive relationships between global PSQI scores and fasting plasma glucose, waist circumference, and BMI, they did not use the definitions of poorer sleepers and metabolic syndrome and its components applied in this work. However, our study extends their finding that subjects with metabolic syndrome had a 55.2% higher risk of being poor sleepers than those without, and hyperglycemia and low HDL-C were independently associated factors of the global PSQI score, and low HDL-C was the only independent predictor of being a poor sleeper.

The mechanism underlying the association between metabolic syndrome and sleep quality remains unclear. Hypothalamic-pituitary-adrenal (HPA) hyperactivity plays a role in the pathogenesis of the metabolic syndrome [24], and activation of the HPA axis can lead to sleeplessness [25]. In addition, several short term studies show that sleep fragmentation or restriction lead to insulin resistance [2,10,11,26], which appears to play a key role in the pathophysiology of metabolic syndrome [27]. Indeed, chronic sleep debt may have modulatory effects on the glucose metabolism and promote the development of the metabolic syndrome, resulting in sleep disorders which in turn lead to poor sleep quality [28].

We found that hyperglycemia is an independent determinant of the global PSQI score, and this result is consistent with Jennings et al. [21]. In addition, previous studies showed that poor sleep quality is also associated with poor glycemic control [19,29] and the development of type 2 diabetes [4]. Although recent studies suggest that sleep restriction reduces insulin sensitivity [2,10,11,26], there are bidirectional interactions between sleep and the glucose metabolism [28]. Moreover, we recently found that impaired glucose tolerance is associated with poor sleep quality, independent of cardiometabolic risk factors [30]. Low HDL-C, but not hypertriglyceridemia, is an independent predictor of the global PSQI score and poor sleepers in our analyses, while Jennings et al. found no association between HDL-C or triglyceride concentrations and global PSQI scores [21]. The mechanism responsible for the association between dyslipidemia and sleep quality remains unclear. However, sleep restriction is associated with increased cortisol and ghrelin levels, sympathetic response and reduced leptin levels [31,32], which may promote the development of atherogenic lipid profiles [33].

We found no association between high blood pressure and the global PSQI score, consistent with Jennings et al. [21]. However, in patients with stage 1 hypertension (160 mmHg > SBP >140 mmHg, and 100 mmHg > DBP >90 mmHg), global PSQI scores were higher in non-dippers as compared with dippers [34–36]. Being poor sleepers was associated with a three-fold increased risk of being non-dippers [34], and the PSQI score is an independent determinant for non-dipping hypertension [35]. The decline of blood pressure at night was inversely related with the global PSQI score and the activation of the sympathetic nervous

**Table 2.** Multivariate linear regression analyses of clinical variables and the global PSQI score.

|                                         | Model 1                   | Model 2                   | Model 3                   |
|-----------------------------------------|---------------------------|---------------------------|---------------------------|
|                                         | Beta (95% CI)             | Beta (95% CI)             | Beta (95% CI)             |
| Age $\geq$ 60 years, yes vs. no         | 0.196 (-0.071 ~ 0.463)    | 0.195 (-0.072 ~ 0.463)    | 0.227 (-0.052 ~ 0.505)    |
| Gender, female vs. male                 | 0.703* (0.519 ~ 0.886)    | 0.843* (0.566 ~ 1.121)    | 0.824* (0.541 ~ 1.107)    |
| Metabolic syndrome, yes vs. no          | 0.960* (0.756 ~ 1.163)    | 0.868* (0.662 ~ 1.073)    | —                         |
| Sleep duration (hours)                  |                           |                           |                           |
| < 6 vs. 6-8                             | 1.025* (0.568 ~ 1.483)    | 0.973* (0.515 ~ 1.431)    | 1.018* (0.557 ~ 1.480)    |
| > 8 vs. 6-8                             | -0.520* (-0.702 ~ -0.339) | -0.551* (-0.733 ~ -0.370) | -0.557* (-0.740 ~ -0.374) |
| Snoring $\geq$ 3 times/week, yes vs. no | —                         | 0.477* (0.260 ~ 0.694)    | 0.522* (0.303 ~ 0.742)    |
| Alcohol drinking, yes vs. no            | —                         | 0.254‡ (-0.012 ~ 0.496)   | 0.264‡ (0.019 ~ 0.510)    |
| Smoking, yes vs. no                     | —                         | 0.204 (-0.041 ~ 0.450)    | 0.228 (-0.022 ~ 0.477)    |
| Habitual exercise, yes vs. no           | —                         | -0.221‡ (-0.402 ~ -0.040) | -0.238‡ (-0.421 ~ -0.055) |
| Creatinine ( $\mu$ mol/l)               | —                         | 0.000 (-0.008 ~ 0.008)    | 0.001 (-0.007 ~ 0.009)    |
| Central obesity, yes vs. no             | —                         | —                         | 0.130 (-0.072 ~ 0.331)    |
| Hyperglycemia, yes vs. no               | —                         | —                         | 0.296‡ (0.049 ~ 0.543)    |
| Elevated blood pressure, yes vs. no     | —                         | —                         | 0.143 (-0.059 ~ 0.344)    |
| Low HDL, yes vs. no                     | —                         | —                         | 0.293‡ (0.097 ~ 0.489)    |
| Hypertriglyceridemia, yes vs. no        | —                         | —                         | -0.061 (-0.280 ~ 0.159)   |

Dependent variable: global PSQI score.

\* $P < 0.001$ ; † $P < 0.005$ ; ‡  $P < 0.05$ .

doi:10.1371/journal.pone.0054304.t002

system [36]. However, the blood pressures of our study subjects were lower than those found in these three earlier studies, and this may have caused the negative results found in the current work. While central obesity is not associated with the global PSQI score and poor sleepers in our analyses, Jennings et al. showed that

BMI, waist circumference, and fat percentage are all positively associated with the global PSQI score [21]. The different results may be due to the different ethnicities, sample sizes, and metabolic syndrome diagnostic criteria used in both works.

**Table 3.** Multivariate logistic regression analyses of poor sleepers (global PSQI score  $>5$ ) and metabolic syndrome.

|                                         | Model 1                | Model 2                |
|-----------------------------------------|------------------------|------------------------|
|                                         | OR (95% CI)            | OR (95% CI)            |
| Age $\geq$ 60 years, yes vs. no         | 1.061 (0.857 ~ 1.313)  | 1.097 (0.881 ~ 1.366)  |
| Gender, female vs. male                 | 1.588* (1.275 ~ 1.978) | 1.545* (1.238 ~ 1.928) |
| Metabolic syndrome, yes vs. no          | 1.478* (1.254 ~ 1.741) | —                      |
| Sleep duration (hours)                  |                        |                        |
| < 6 vs. 6-8                             | 1.943† (1.292 ~ 2.923) | 1.995† (1.327 ~ 2.999) |
| > 8 vs. 6-8                             | 0.657* (0.569 ~ 0.757) | 0.656* (0.569 ~ 0.756) |
| Snoring $\geq$ 3 times/week, yes vs. no | 1.302† (1.095 ~ 1.548) | 1.346† (1.131 ~ 1.601) |
| Alcohol drinking, yes vs. no            | 1.135 (0.938 ~ 1.373)  | 1.147 (0.947 ~ 1.390)  |
| Smoking, yes vs. no                     | 1.060 (0.874 ~ 1.286)  | 1.075 (0.885 ~ 1.307)  |
| Habitual exercise, yes vs. no           | 0.871 (0.755 ~ 1.005)  | 0.865‡ (0.750 ~ 0.997) |
| Creatinine ( $\mu$ mol/l)               | 1.000 (0.994 ~ 1.007)  | 1.001 (0.995 ~ 1.007)  |
| Central obesity, yes vs. no             | —                      | 1.004 (0.857 ~ 1.175)  |
| Hyperglycemia, yes vs. no               | —                      | 1.139 (0.937 ~ 1.383)  |
| Elevated blood pressure, yes vs. no     | —                      | 1.034 (0.883 ~ 1.210)  |
| Low HDL, yes vs. no                     | —                      | 1.176‡ (1.009 ~ 1.372) |
| Hypertriglyceridemia, yes vs. no        | —                      | 0.904 (0.761 ~ 1.074)  |

Dependent variable: poorer sleepers (global PSQI score  $>5$ ).\* $P < 0.001$ ; † $P < 0.005$ ; ‡  $P < 0.05$ .

doi:10.1371/journal.pone.0054304.t003

Our analyses show that short sleep duration increased the risk of poor sleep quality, but long sleep duration decreased it. Similarly, Bidulescu et al. found an inverse relationship between continuous sleep duration and global PSQI score [37], and previous studies showed that the sleep fragmentation score, a measurement of sleep quality obtained by actigraphy, is inversely related to sleep duration [18,38]. Previous works also showed that long sleepers had a lower global PSQI scores among older Caucasian men [39], middle-aged African American [37], and older Chinese [40], consistent with our results. Patel et al. showed that there are no differences in sleep stage distribution and sleep fragmentation between subjects who report long ( $\geq 9$  hours) versus normal (7–8 hours) sleep durations [39]. The reason why long sleepers had better sleep quality, as assessed by PSQI, remains unclear. Aeschbach et al. suggested that long sleepers ( $>9$  hours) may have longer biological nights due to having different circadian rhythms, compared to short sleepers ( $<6$  hours) [41], since the nocturnal intervals of high plasma melatonin levels, increasing cortisol levels, low body temperature, and increasing sleepiness are longer in the former than the latter [41].

In the current study, habitual exercise is negatively associated with global PSQI scores and poor sleepers, and this is consistent with Bidulescu et al., which found that physical activity is associated with better sleep quality, based on tertiles of the global PSQI score [37].

There are several limitations in the present study. First, since this work is cross-sectional in nature, the causal relationship between metabolic syndrome and sleep quality score could not be established. Second, we did not measure sleep by objective means, such as actigraphy and polysomnography, and subjects with undiagnosed obstructive sleep apnea (OSA) might not have been excluded. However, we adjusted for snoring, a common symptom

of OSA, in the regression analyses, and the association between metabolic syndrome and poor sleep quality persisted. In addition, self-reports measure sleep in usual circumstances, and provide an overall sense of sleep rather than measuring on particular nights, as occurs using actigraphy or polysomnography. Furthermore, the PSQI is not related to objective measures of sleep, such as wrist actigraphy and polysomnography, in African Americans [42]. Third, we did not assess the level of psychological or socioeconomic stress, although the association between several self-reported stress measurements and the global PSQI score have been inconsistent in earlier research [42]. Finally, we did not measure hormones, which are involved in the association between sleep quality and metabolic syndrome, such as insulin resistance, sympathoadrenal activity, ghrelin and leptin [10,11,43].

In summary, we found that subjects with metabolic syndrome have significantly higher global PSQI scores and higher risk of being poor sleepers than those without metabolic syndrome. Furthermore, as for the impact of the components of metabolic syndrome on sleep quality, hyperglycemia and low HDL-C were independently associated factors of the global PSQI score, while low HDL-C was the only independent predictor of being a poor sleeper. Therefore, it is recommended that subjects with metabolic syndrome, especially with hyperglycemia and low HDL-C, should undergo screening with regard to sleep quality in order to aid the early detection of poor sleepers in clinical practice.

## Author Contributions

Conceived and designed the experiments: CJC. Performed the experiments: YCY HYO JSW FHL CJC. Analyzed the data: YCY HYO CJC. Contributed reagents/materials/analysis tools: JSW FWL. Wrote the paper: HCH.

## References

- Van Cauter E, Spiegel K, Tasali E, Leproult R (2008) Metabolic consequences of sleep and sleep loss. *Sleep Med (Suppl 1)*: S23–S28.
- Spiegel K, Leproult R, Van Cauter E (1999) Impact of sleep debt on metabolic and endocrine function. *Lancet* 354: 1435–1439.
- Chao CY, Wu JS, Yang YC, Shih CC, Wang RH, et al. (2011) Sleep duration is a potential risk factor for newly diagnosed type 2 diabetes mellitus. *Metabolism* 60: 799–804.
- Cappuccio FP, D'Elia L, Strazzullo P, Miller MA (2010) Quantity and quality of sleep and incidence of type 2 diabetes: a systematic review and meta-analysis. *Diabetes Care* 33: 414–420.
- Kohatsu ND, Tsai R, Young T, Vangilder R, Burmeister LF, et al. (2006) Sleep duration and body mass index in a rural population. *Arch Intern Med* 166: 1701–1705.
- Patel SR, Blackwell T, Redline S, Ancoli-Israel S, Cauley JA, et al. (2008) The association between sleep duration and obesity in older adults. *Int J Obes (Lond)* 32: 1825–1834.
- Kronholm E, Laatikainen T, Peltonen M, Sippola R, Partonen T (2011) Self-reported sleep duration, all-cause mortality, cardiovascular mortality and morbidity in Finland. *Sleep Med* 12: 215–221.
- Cappuccio FP, Cooper D, D'Elia L, Strazzullo P, Miller MA (2011) Sleep duration predicts cardiovascular outcomes: a systematic review and meta-analysis of prospective studies. *Eur Heart J* 32: 1484–1492.
- Cappuccio FP, D'Elia L, Strazzullo P, Miller MA (2010) Sleep duration and all-cause mortality: a systematic review and meta-analysis of prospective studies. *Sleep* 33: 585–592.
- Tasali E, Leproult R, Ehrmann DA, Van Cauter E (2008) Slow-wave sleep and the risk of type 2 diabetes in humans. *Proc Natl Acad Sci USA* 105: 1044–1049.
- Stamatakis KA, Punjabi NM (2010) Effects of sleep fragmentation on glucose metabolism in normal subjects. *Chest* 137: 95–101.
- Rod NH, Vahtera J, Westerlund H, Kivimäki M, Zins M, et al. (2011) Sleep disturbances and cause-specific mortality: results from the GAZEL cohort study. *Am J Epidemiol* 173: 300–309.
- Grundy SM, Cleeman JI, Daniels SR, Donato KA, Eckel RH, et al. (2005) Diagnosis and management of the metabolic syndrome: an American Heart Association/National Heart, Lung, and Blood Institute Scientific Statement. *Circulation* 112: 2735–2752.
- Park YW, Zhu S, Palaniappan L, Heshka S, Carnethon MR, et al. (2003) The metabolic syndrome: prevalence and associated risk factor findings in the US population from the Third National Health and Nutrition Examination Survey, 1988–1994. *Arch Intern Med* 163: 427–436.
- Choi KM, Lee JS, Park HS, Baik SH, Choi DS, et al. (2008) Relationship between sleep duration and the metabolic syndrome: Korean National Health and Nutrition Survey 2001. *Int J Obes (Lond)* 32: 1091–1097.
- Hall MH, Muldoon MF, Jennings JR, Buysse DJ, Flory JD, et al. (2008) Self-reported sleep duration is associated with the metabolic syndrome in midlife adults. *Sleep* 31: 635–643.
- Wu MC, Yang YC, Wu JS, Wang RH, Lu FH, et al. (2012) Short sleep duration associated with a higher prevalence of metabolic syndrome in an apparently healthy population. *Prev Med*. In press. doi: 10.1016/j.ypmed.2012.07.013.
- Lauderdale DS, Knutson KL, Rathouz PJ, Yan LL, Hulley SB, et al. (2009) Cross-sectional and longitudinal associations between objectively measured sleep duration and body mass index: the CARDIA Sleep Study. *Am J Epidemiol* 170: 805–813.
- Knutson KL, Van Cauter E, Zee P, Liu K, Lauderdale DS (2011) Cross-sectional associations between measures of sleep and markers of glucose metabolism among subjects with and without diabetes: The Coronary Artery Risk Development in Young Adults (CARDIA) Sleep Study. *Diabetes Care* 34: 1171–1176.
- Buysse DJ, Reynolds CF 3rd, Monk TH, Berman SR, Kupfer DJ (1989) The Pittsburgh Sleep Quality Index: a new instrument for psychiatric practice and research. *Psychiatry Res* 28: 193–213.
- Jennings JR, Muldoon MF, Hall M, Buysse DJ, Manuck SB (2007) Self-reported sleep quality is associated with the metabolic syndrome. *Sleep* 30: 219–223.
- Tsai PS, Wang SY, Wang MY, Su CT, Yang TT, et al. (2005) Psychometric evaluation of the Chinese version of the Pittsburgh Sleep Quality Index (PSQI) in primary insomnia and control subjects. *Qual Life Res* 14: 1943–1952.
- Siconolfi SF, Lasater TM, Snow RC, Carleton RA (1985) Self-reported physical activity compared with maximal oxygen uptake. *Am J Epidemiol* 122: 101–105.
- Cagampang FR, Poore KR, Hanson MA (2011) Developmental origins of the metabolic syndrome: body clocks and stress responses. *Brain Behav Immun* 25: 214–220.
- Vgontzas AN, Chrousos GP (2002) Sleep, the hypothalamic-pituitary-adrenal axis, and cytokines: multiple interactions and disturbances in sleep disorders. *Endocrinol Metab Clin North Am* 31: 15–36.
- Buxton OM, Pavlova M, Reid EW, Wang W, Simonson DC, et al. (2010) Sleep restriction for one week reduces insulin sensitivity in healthy men. *Diabetes* 59: 2126–2133.

27. Cornier MA, Dabelea D, Hernandez TL, Lindstrom RC, Steig AJ, et al. (2008) The metabolic syndrome. *Endocr Rev* 29: 777–822.
28. Martins RC, Andersen ML, Tufik S (2008) The reciprocal interaction between sleep and type 2 diabetes mellitus: facts and perspectives. *Braz J Med Biol Res* 41: 180–187.
29. Knutson KL, Ryden AM, Mander BA, Van Cauter E (2006) Role of sleep duration and quality in the risk and severity of type 2 diabetes mellitus. *Arch Intern Med* 166: 1768–1774.
30. Hung HC, Yang YC, Ou HY, Wu JS, Lu FH, et al. (2012) The relationship between impaired fasting glucose and self-reported sleep quality in a Chinese population. *Clin Endocrinol*. In press. doi: 10.1111/j.1365-2265.2012.04423.x.
31. Taheri S, Lin L, Austin D, Young T, Mignot E (2004) Short sleep duration is associated with reduced leptin, elevated ghrelin, and increased body mass index. *PLoS Med* 1: e62.
32. Spiegel K, Leproult R, L'hermite-Balériaux M, Copinschi G, Penev PD, et al. (2004) Leptin levels are dependent on sleep duration: relationships with sympathovagal balance, carbohydrate regulation, cortisol, and thyrotropin. *J Clin Endocrinol Metab* 89: 5762–5771.
33. Nonogaki K (2000) New insights into sympathetic regulation of glucose and fat metabolism. *Diabetologia* 43: 533–549.
34. Yilmaz MB, Yalta K, Turgut OO, Yilmaz A, Yucel O, et al. (2007) Sleep quality among relatively younger patients with initial diagnosis of hypertension: dippers versus non-dippers. *Blood Press* 16: 101–105.
35. Erden I, Erden EC, Ozhan H, Basar C, Aydin M, et al. (2010) Poor-quality sleep score is an independent predictor of nondipping hypertension. *Blood Press Monit* 15: 184–187.
36. Huang Y, Mai W, Hu Y, Wu Y, Song Y, et al. (2011) Poor sleep quality, stress status, and sympathetic nervous system activation in nondipping hypertension. *Blood Press Monit* 16: 117–123.
37. Bidulescu A, Din-Dzietham R, Coverson DL, Chen Z, Meng YX, et al. (2010) Interaction of sleep quality and psychosocial stress on obesity in African Americans: the Cardiovascular Health Epidemiology Study (CHES). *BMC Public Health* 10: 581.
38. Van den Berg JF, Knvistingh Neven A, Tulen JH, Hofman A, Witteman JC, et al. (2008) Actigraphic sleep duration and fragmentation are related to obesity in the elderly: the Rotterdam Study. *Int J Obes (Lond)* 32: 1083–1090.
39. Patel SR, Blackwell T, Ancoli-Israel S, Stone KL, Osteoporotic Fractures in Men-MrOS Research Group (2012) Sleep characteristics of self-reported long sleepers. *Sleep* 35: 641–648.
40. Lo CM, Lee PH (2012) Prevalence and impacts of poor sleep on quality of life and associated factors of good sleepers in a sample of older Chinese adults. *Health Qual Life Outcomes*. 10: 72.
41. Aeschbach D, Sher L, Postolache TT, Matthews JR, Jackson MA, et al. (2003) A longer biological night in long sleepers than in short sleepers. *J Clin Endocrinol Metab* 88: 26–30.
42. Buysse DJ, Hall ML, Strollo PJ, Kamarck TW, Owens J, et al. (2008) Relationships between the Pittsburgh Sleep Quality Index (PSQI), Epworth Sleepiness Scale (ESS), and clinical/polysomnographic measures in a community sample. *J Clin Sleep Med* 4: 563–571.
43. Knutson KL (2010) Sleep duration and cardiometabolic risk: A review of the epidemiologic evidence. *Best Pract Res Clin Endocrinol Metab* 24: 731–743.
